# Supplementary material for: Structural brain differences related to compulsive sexual behavior disorder
Source: PubMed Central journal article supplement — J Behav Addict. 2023 Mar 21;12(1):278–87. doi: 10.1556/2006.2023.00008 (PMC10260207; doi:10.1556/2006.2023.00008), 2023-03-21
Supplement: jba-12-278-s001.pdf [file jba-12-278-s001.pdf]

**Görts, P. et al.: Structural brain differences related to compulsive sexual behavior disorder. <https://doi.org/10.1556/2006.2023.00008>**

## **Supplemental material**

### **METHODS**

#### **Detailed recruitment procedures**

An initial screening regarding CSBD and inclusion and exclusion criteria was made by telephone interview. Potential participants received information about the study and were invited to log into a secure web-based platform, leave a preliminary informed consent, and fill in questionnaires including details on personal information. Furthermore, detailed information on the study protocol was provided including that participation was voluntary and could be interrupted at any time. The participants were thereafter evaluated face to face by a psychiatrist and a psychologist at ANOVA Clinic, Karolinska University Hospital, Stockholm, Sweden. The psychiatrist obtained the medical history, assessed for CSBD according to the ICD-11 criteria and for psychiatric diagnoses using the Mini International Neuropsychiatric Interview (Sheehan et al., 1998). The study psychologist verified the participant's responses of sexual behaviors in the web-based questionnaires (e.g., the Hypersexual Disorder Screening Inventory, HDSI (Parsons et al., 2013), conducted a structured interview addressing the criteria for CSBD and HD, as well as assessed for paraphilia(s) in accordance with the criteria specified in DSM-5. To be eligible for the study, the participants had to meet the criteria of CSBD in ICD-11, and fulfill 3 of the 5 A-criteria and one of 2 B-criteria of the suggested DSM-5 conceptualization for HD as it was originally proposed (Kafka, 2010).

Participants were considered as eligible if both the psychiatrist and the psychologist agreed on the eligibility criteria and none of the psychiatric exclusion criteria (see below). Eligible participants were enrolled after signing a written informed consent. Study participants were invited to Karolinska Institutet for cognitive and MRI data assessment performed by trained personal.

### **Inclusion criteria**

Because of the high prevalence of males in CSBD and to facilitate recruitment and study completion, participants were male, at least 18 years of age, and fluent in the Swedish language. Patients had not started with any psychotherapy or psychological treatment. Controls were physically and psychologically healthy and show no indication of HD or CSBD, e.g., a score below 20 points on the Hypersexual Disorder Screening Inventory (HDSI), and below 53 points on the Hypersexual Behavior Inventory (HBI) (Reid, Garos, & Carpenter, 2011).

### **Exclusion criteria**

For both patients and controls any reported medical or clinical condition known to affect brain structure and function, test performance, or associated with risks for the MRI environment were exclusionary. We excluded for severe neurological/psychiatric diseases or conditions (e.g., major depression, bipolar disorder, ADHD, panic/ anxiety disorder, autism, obsessive compulsive disorder, personality disorder, Parkinson's disease, epilepsy, PTSD, chronic stress/burnout syndrome, Alzheimer's disease, dementia, history of psychotic symptoms). We further excluded for gender identity disorder/gender dysphoria and pedophilic disorder. We excluded persons reporting impaired vision, or other vision problems that cannot be corrected with MR-safe equipment, to assure the adequate performance in vision based fMRI

experiments, hearing impairments, or problems with other senses, history of severe brain damage/injuries, claustrophobia. Any MRI contraindications were exclusionary: e.g., having metal implants or a pacemaker. We further excluded for alcohol/drug dependence, eating disorder (e.g. binge-eating), pathological gambling, during the past 6 months, HIV and hepatitis C/B, if the condition was untreated or virus levels detectable, untreated endocrine diseases (e.g., thyroid disorder, pituitary dysfunction, gonadal dysfunction or diabetes). Use of the following medication types were excluded: benzodiazepines, antipsychotics, mood stabilizers (e.g., lithium), antidepressants/SSRI (if use started less than 3 months ago), any medication or pharmaceutical drug that interferes with sex hormone production or metabolism, e.g., ketoconazole, cyproterone acetate, spironolactone. Due to a potentially higher prevalence of comorbidities in HD patients (Kafka), we did not exclude patients who reported depression, GAD, panic disorder, ADHD, chronic pain, or an episode of elevated mood (hypomania). Full blown mania and bipolar disorder was however excluded. Paraphilias were also allowed in patients. The corresponding information was recorded in order to control for potential confounders. However, severe depression requiring immediate treatment, change of concurrent medication or dosage in the last 3 months, sexual behaviors with high risk for offending, or ongoing psychotherapeutic treatment were excluded.

No participants were excluded after enrolment. One patient did not provide MRI data due to discomfort in the MR scanner.

## **Questionnaires**

Using questionnaires we assessed depression symptom levels (Montgomery Asberg Depression Rating Scale (MADRS-S) (Montgomery & Asberg, 1979; Svanborg & Asberg, 2001), attention-deficit levels (Adult ADHD Self-Report Scale (ASRS) (Kessler et al., 2005), alcohol and drug consumption (Alcohol Use Disorders Identification Test (AUDIT) (Bergman & Kallmen, 2002); Drug Use Disorders Identification Test (DUDIT) (Berman, Bergman,

Palmstierna, & Schlyter, 2005), hypersexual symptoms (Hypersexual Disorder Screening Inventory (HDSI) (Parsons et al., 2013), Hypersexual Behavior Inventory (HBI) (Reid, Garos, & Carpenter, 2011), sexual compulsivity (Sexual Compulsivity Scale (SCS) (Kalichman & Rompa, 1995), State-Trait Anxiety Inventory - State (STAI-S) (Tluczek, Henriques, & Brown, 2009), autism spectrum disorder symptoms (Ritvo Autism Asperger Diagnostic Scale (RAADS) (Eriksson, Andersen, & Bejerot, 2013), sexual desire (Sexual Desire Inventory (SDI) (Spector, Carey, & Steinberg, 1996), general impulsivity (Barratt Impulsiveness Scale (BIS-11) (Stanford et al., 2009), and behavioral inhibition (Behavioral Inhibition/Activation System (BIS/BAS) (Carver & White, 1994).

In addition, we assessed sexual orientation through the Kinsey scale where a score of 0 corresponds to ‘exclusively heterosexual’ and a score of 6 to ‘exclusively homosexual’ (Kinsey, Pomeroy, & Martin, 1948). Finally, we assessed the frequency of sexual encounters within the last 6 months, as well as weekly pornography consumption.

### **Sensitivity analyses**

We repeated group comparisons while using each variable listed in Table S1a as additional covariates (one at a time). For some variables, i.e., self-reported medication use and comorbidity, where the number of participants with a specific comorbidity or medication use was low (see Table S1b), sensitivity test were conducted by repeating the group comparisons while excluding corresponding participants.

**Table S1a. Variables controlled for in sensitivity analyses**

| Control variable   | p-value of case-control difference |
|--------------------|------------------------------------|
| AUDIT <sup>a</sup> | 0.013                              |
| MADRS <sup>a</sup> | 0.286                              |

|                                             |         |
|---------------------------------------------|---------|
| DUDIT <sup>a</sup>                          | 0.003   |
| ASRS <sup>a</sup>                           | 0.010   |
| RAADS-14 <sup>a</sup>                       | 0.011   |
| BIS-11 <sup>a</sup>                         | 0.037   |
| BAS drive <sup>a</sup>                      | 0.009   |
| BAS fun seeking <sup>a</sup>                | 0.008   |
| BAS reward response <sup>a</sup>            | 0.003   |
| BIS <sup>a</sup>                            | 0.002   |
| Kinsey scale <sup>a</sup>                   | 0.004   |
| STAI-S <sup>a</sup>                         | < 0.001 |
| Depression <sup>b</sup>                     | 0.003   |
| Panic disorder <sup>b</sup>                 | 0.005   |
| General anxiety disorder (GAD) <sup>b</sup> | 0.005   |
| ADHD <sup>b</sup>                           | 0.004   |
| Chronic pain <sup>b</sup>                   | 0.004   |
| Hypomania <sup>b</sup>                      | 0.005   |
| Antidepressants <sup>b</sup>                | 0.011   |
| Antihistamines <sup>b</sup>                 | 0.008   |
| Anxiety medication <sup>b</sup>             | 0.003   |
| Central stimulants <sup>b</sup>             | 0.010   |
| Bloodpressure medication <sup>b</sup>       | 0.005   |
| BMI <sup>a</sup>                            | 0.011   |
| Handedness <sup>b</sup>                     | 0.003   |
| Smoking <sup>b</sup>                        | 0.002   |
| Moist snuff <sup>b</sup>                    | 0.009   |
| Total brain volume <sup>a</sup>             | 0.001   |
| Non-verbal intelligence <sup>a,*</sup>      | 0.003   |

a: used as covariate, b: participants who had that specific comorbidity or used that medication type were excluded from analyses; for smoking and moist snuff use, only non-users, and for handedness, only right handed individuals were included in sensitivity analyses.

\*Measured with Ravens Standard Progressive Matrices, SPM (Raven, Raven, & Court, 2000) as part of the cognitive test battery previously reported in (Liberg et al., 2022).

**Table S1b: Medication use and psychiatric comorbidity**

|                        | HC (n=20) | CSBD (n=23) | HC vs. CSBD, p |
|------------------------|-----------|-------------|----------------|
| <b>Medication</b>      |           |             |                |
| <i>antihistamine</i>   | 3         | 2           | 0.431          |
| <i>stimulants</i>      | 0         | 2           | 0.280          |
| <i>blood pressure</i>  | 0         | 2           | 0.144          |
| <i>antidepressants</i> | 1         | 4           | 0.219          |
| <b>Comorbidity</b>     |           |             |                |
| <i>Panic disorder</i>  | 0         | 1           | 0.535          |
| <i>GAD</i>             | 0         | 2           | 0.280          |
| <i>ADHD</i>            | 0         | 2           | 0.280          |
| <i>Chronic pain</i>    | 0         | 1           | 0.535          |
| <i>Hypomania</i>       | 0         | 1           | 0.535          |
| <i>Depression</i>      | 0         | 2           | 0.280          |

These results have been reported and discussed previously (Liberg et al., 2022), but are listed here to provide reasoning for sensitivity tests conducted.

**Table S2. Frequency of sexual encounters**

| Sexual encounter information | Group | Mean | SD | p |
|------------------------------|-------|------|----|---|
|------------------------------|-------|------|----|---|

|                                                       |      |            |              |       |
|-------------------------------------------------------|------|------------|--------------|-------|
| Nr of same-sex partners (last month)                  | HC   | 0.1        | 0.308        | 0.409 |
|                                                       | CSBD | 0.61       | 2.709        |       |
| Nr of same-sex partners (last 6 months)               | HC   | 0.25       | 0.91047      | 0.383 |
|                                                       | CSBD | 1.695<br>7 | 7.27658      |       |
| Nr of opposite-sex partners (last month)              | HC   | 0.95       | 0.60481      |       |
|                                                       | CSBD | 1.130<br>4 | 0.96786      | 0.476 |
| Nr of opposite-sex partners (last 6 months)           | HC   | 1.25       | 1.06992      |       |
|                                                       | CSBD | 3.521<br>7 | 5.22989      | 0.064 |
| Frequency of same-sex intercourse (last month)        | HC   | 0.5        | 1.79179      |       |
|                                                       | CSBD | 1.043<br>5 | 4.21554      | 0.595 |
| Frequency of same-sex intercourse (last 6 months)     | HC   | 3.45       | 13.3829<br>2 |       |
|                                                       | CSBD | 2.782<br>6 | 9.71857      | 0.851 |
| Frequency of opposite-sex intercourse (last month)    | HC   | 4.2        | 4.112        |       |
|                                                       | CSBD | 3.48       | 5.624        | 0.638 |
| Frequency of opposite-sex intercourse (last 6 months) | HC   | 23.2       | 20.526       |       |
|                                                       | CSBD | 20.48      | 32.404       | 0.748 |

**Table S3. Group differences in subcortical volume ROIs. Volumetric measures are given in mm<sup>3</sup>**

| Brain region | HC     |       | CSBD   |       | F (1, 39) | p     | Cohens <i>d</i> |
|--------------|--------|-------|--------|-------|-----------|-------|-----------------|
|              | Mean   | SD    | Mean   | SD    |           |       |                 |
| Rh Accumbens | 666.1  | 68.8  | 694.0  | 85.5  | 1.458     | 0.234 | 0.36            |
| Rh Amygdala  | 1916.1 | 222.8 | 1843.9 | 187.7 | 1.302     | 0.261 | -0.35           |
| Rh Caudate   | 3632.4 | 421.3 | 3751.4 | 479.6 | 0.705     | 0.406 | 0.26            |
| Lh Accumbens | 619.8  | 96.5  | 592.0  | 88.2  | 0.976     | 0.329 | -0.30           |
| Lh Amygdala  | 1748.0 | 230.6 | 1742.6 | 214.6 | 0.006     | 0.938 | -0.024          |
| Lh Caudate   | 3609.0 | 393.4 | 3622.2 | 469.8 | 0.01      | 0.921 | 0.030           |



**Table S4. Correlation between level of CSBD symptoms and right posterior cingulate surface area**

| Measurement | Total sample |       | HC     |       | CSBD   |       |
|-------------|--------------|-------|--------|-------|--------|-------|
|             | beta         | p     | beta   | p     | beta   | p     |
| HDSI        | -0.449       | 0.003 | -0.213 | 0.396 | -0.029 | 0.903 |
| HBI         | -0.407       | 0.008 | 0.060  | 0.816 | -0.012 | 0.960 |
| SCS         | -0.396       | 0.011 | 0.094  | 0.701 | 0.003  | 0.989 |
| SDI         | -0.312       | 0.061 | 0.009  | 0.972 | -0.063 | 0.812 |

**Table S5. Whole brain analysis: surface area (exploratory)**

| Brain region                     | HC      |        | CSBD    |        | F (1, 39) | p     | Cohen's <i>d</i> |
|----------------------------------|---------|--------|---------|--------|-----------|-------|------------------|
|                                  | Mean    | SD     | Mean    | SD     |           |       |                  |
| Rh posterior cingulate           | 1301.75 | 181.2  | 1156.78 | 117.37 | 9.42      | 0.004 | 0.95             |
| Rh caudalanteriorcingulate       | 763.74  | 148.23 | 664.1   | 110.95 | 6.17      | 0.017 | 0.76             |
| lh_posteriorcingulate_area       | 1148.16 | 119.27 | 1260.17 | 187.26 | 5.09      | 0.030 | -0.71            |
| rh_inferiortemporal_area         | 3506.53 | 385.46 | 3305.79 | 309.58 | 3.42      | 0.072 | 0.57             |
| lh_middletemporal_area           | 3347.86 | 340.48 | 3160.17 | 332.29 | 3.34      | 0.075 | 0.56             |
| lh_paracentral_area              | 1343.58 | 111.01 | 1416.11 | 152.64 | 2.97      | 0.093 | -0.54            |
| rh_paracentral_area              | 1498.3  | 143.09 | 1578.23 | 172.92 | 2.6       | 0.115 | -0.50            |
| rh_rostralanteriorcingulate_area | 654.8   | 111    | 609.14  | 91.61  | 2.08      | 0.157 | 0.45             |
| lh_isthmuscingulate_area         | 1099.11 | 158.16 | 1037.77 | 122.16 | 1.95      | 0.170 | 0.43             |
| rh_middletemporal_area           | 3619.1  | 467.68 | 3438.77 | 372.85 | 1.89      | 0.178 | 0.43             |

|                                  |         |        |         |        |      |       |       |
|----------------------------------|---------|--------|---------|--------|------|-------|-------|
| rh_isthmuscingulate_area         | 947.74  | 114.57 | 899.83  | 126.35 | 1.61 | 0.212 | 0.4   |
| rh_fusiform_area                 | 3271.11 | 374.41 | 3129.4  | 391.91 | 1.48 | 0.232 | 0.37  |
| lh_inferiorparietal_area         | 4730.31 | 742.87 | 4499.99 | 454.71 | 1.46 | 0.234 | 0.37  |
| lh_supramarginal_area            | 4180.2  | 538.34 | 4390.32 | 657.91 | 1.32 | 0.258 | -0.35 |
| rh_entorhinal_area               | 449.19  | 74.55  | 421.28  | 83.09  | 1.27 | 0.267 | 0.35  |
| rh_bankssts_area                 | 902     | 137.64 | 853.86  | 139.41 | 1.25 | 0.271 | 0.35  |
| rh_parstriangularis_area         | 1609.66 | 274.2  | 1528.45 | 216.45 | 1.24 | 0.272 | 0.33  |
| rh_lateraloccipital_area         | 5222.87 | 460.84 | 5409.39 | 697.23 | 1.18 | 0.284 | -0.32 |
| lh_lateralorbitofrontal_area     | 2861.49 | 275.65 | 2780.1  | 290.63 | 0.85 | 0.363 | 0.29  |
| lh_medialorbitofrontal_area      | 2098.28 | 261.6  | 2034.11 | 195.09 | 0.83 | 0.367 | 0.28  |
| lh_frontalpole_area              | 271.5   | 39.23  | 262.18  | 28.88  | 0.76 | 0.389 | 0.27  |
| lh_bankssts_area                 | 1033.64 | 265.82 | 974.05  | 171.26 | 0.74 | 0.394 | 0.27  |
| lh_parsopercularis_area          | 1730.26 | 282.01 | 1652.63 | 296.71 | 0.74 | 0.394 | 0.27  |
| rh_inferiorparietal_area         | 5544.03 | 831.41 | 5360.93 | 551.14 | 0.72 | 0.401 | 0.26  |
| lh_precuneus_area                | 4116.52 | 431.6  | 4005.26 | 418.51 | 0.71 | 0.405 | 0.26  |
| lh_rostralanteriorcingulate_area | 916.58  | 143.95 | 876.15  | 166.15 | 0.69 | 0.412 | 0.26  |
| rh_lingual_area                  | 3310.2  | 301.97 | 3393.86 | 372.7  | 0.62 | 0.434 | -0.25 |
| rh_lateralorbitofrontal_area     | 2969.01 | 336.19 | 2890.54 | 324.93 | 0.58 | 0.450 | 0.24  |
| lh_lingual_area                  | 3098.14 | 342.8  | 3022.51 | 360.99 | 0.47 | 0.497 | 0.21  |
| rh_pericalcarine_area            | 1554.65 | 227.66 | 1603.5  | 243.56 | 0.44 | 0.510 | -0.21 |
| rh_insula_area                   | 2421.97 | 217.75 | 2474.07 | 283.69 | 0.43 | 0.516 | -0.21 |
| lh_cuneus_area                   | 1607.44 | 242.88 | 1557.78 | 271.11 | 0.4  | 0.533 | 0.19  |
| lh_lateraloccipital_area         | 5309.34 | 591.03 | 5216.42 | 421.4  | 0.35 | 0.561 | 0.18  |
| lh_transversetemporal_area       | 487.94  | 90.76  | 473.55  | 67.29  | 0.34 | 0.562 | 0.18  |

|                                 |              |             |              |             |      |       |       |
|---------------------------------|--------------|-------------|--------------|-------------|------|-------|-------|
| rh_superiortemporal_area        | 3699.1       | 319.92      | 3758.45      | 362.87      | 0.31 | 0.582 | -0.17 |
| lh_superiorparietal_area        | 5781.87      | 592.73      | 5685.98      | 614.71      | 0.28 | 0.599 | 0.16  |
| lh_temporalpole_area            | 504.73       | 96.41       | 489.38       | 89.23       | 0.28 | 0.60  | 0.17  |
| lh_entorhinal_area              | 525.51       | 47.15       | 533.22       | 45.99       | 0.28 | 0.60  | -0.17 |
| lh_caudalmiddlefrontal_area     | 2343.27      | 383.25      | 2400.4       | 345.4       | 0.25 | 0.618 | -0.16 |
| lh_parsorbitalis_area           | 729.78       | 81.03       | 742.79       | 86.84       | 0.25 | 0.618 | -0.15 |
| lh_WhiteSurfArea_area           | 90139.5<br>2 | 6052.6<br>6 | 89274.2<br>6 | 5430.9<br>1 | 0.24 | 0.630 | 0.15  |
| rh_precuneus_area               | 4283.24      | 501.49      | 4209.96      | 504.9       | 0.22 | 0.644 | 0.15  |
| rh_superiorfrontal_area         | 7582.65      | 674.04      | 7479.64      | 739.38      | 0.22 | 0.645 | 0.15  |
| rh_WhiteSurfArea_area           | 89720.4<br>2 | 6198.8<br>1 | 88874.1<br>8 | 5612.5<br>3 | 0.21 | 0.646 | 0.14  |
| rh parahippocampal_area         | 640.55       | 79.95       | 651.55       | 78.22       | 0.21 | 0.652 | -0.14 |
| rh_postcentral_area             | 4030.81      | 395.76      | 4084.81      | 415.56      | 0.18 | 0.673 | -0.13 |
| rh_superiorparietal_area        | 5602.7       | 580.74      | 5537.13      | 509.95      | 0.15 | 0.697 | 0.12  |
| rh_frontalpole_area             | 339.07       | 35.05       | 335.57       | 24.32       | 0.15 | 0.704 | 0.12  |
| lh_inferiortemporal_area        | 3534.92      | 371.08      | 3496.03      | 318.83      | 0.13 | 0.720 | 0.11  |
| lh_superiortemporal_area        | 4197.69      | 420.54      | 4147.56      | 490.14      | 0.13 | 0.723 | 0.11  |
| rh_rostralmiddlefrontal_area    | 5998.43      | 798.36      | 6077.16      | 695.77      | 0.12 | 0.731 | -0.11 |
| rh_temporalpole_area            | 508.1        | 63.47       | 501.64       | 73.07       | 0.09 | 0.764 | 0.09  |
| rh_medialorbitofrontal_area     | 2106.33      | 171.44      | 2091.7       | 169.59      | 0.08 | 0.780 | 0.09  |
| rh_cuneus_area                  | 1677.87      | 182.98      | 1694.39      | 197.75      | 0.08 | 0.783 | -0.09 |
| lh_superiorfrontal_area         | 7804.51      | 718.84      | 7747.68      | 665.48      | 0.07 | 0.793 | 0.08  |
| lh_caudalanteriorcingulate_area | 666.49       | 141         | 676.78       | 111.39      | 0.07 | 0.795 | -0.08 |
| lh_insula_area                  | 2501.02      | 181.36      | 2485.53      | 246.87      | 0.05 | 0.822 | 0.07  |

|                               |         |        |         |        |      |       |       |
|-------------------------------|---------|--------|---------|--------|------|-------|-------|
| lh_postcentral_area           | 4224.25 | 431.31 | 4251.23 | 427.71 | 0.04 | 0.842 | -0.06 |
| rh_supramarginal_area         | 3805.59 | 500.05 | 3831.46 | 442.26 | 0.04 | 0.852 | -0.05 |
| lh_pericalcarine_area         | 1420.63 | 229.72 | 1435.29 | 273.39 | 0.04 | 0.853 | -0.06 |
| lh_precentral_area            | 5068.01 | 345.86 | 5089.22 | 486.67 | 0.03 | 0.874 | -0.05 |
| lh parahippocampal_area       | 683.6   | 73.35  | 680.09  | 70.44  | 0.03 | 0.876 | 0.05  |
| rh_parsopercularis_area       | 1462.47 | 235.06 | 1474.26 | 262.73 | 0.02 | 0.878 | -0.05 |
| rh_transversetemporal_area    | 340.25  | 43.9   | 342.09  | 48.7   | 0.02 | 0.896 | -0.04 |
| lh_parstriangularis_area      | 1344.09 | 180.26 | 1351.56 | 222.9  | 0.02 | 0.903 | -0.04 |
| lh rostral middlefrontal_area | 6147.34 | 735.92 | 6168.56 | 696.92 | 0.01 | 0.925 | -0.03 |
| rh_precentral_area            | 4949.5  | 515.35 | 4956.27 | 437.6  | 0    | 0.964 | -0.01 |
| rh_parsorbitalis_area         | 890.08  | 106.64 | 889.43  | 96.07  | 0    | 0.983 | 0.01  |
| rh_caudalmiddlefrontal_area   | 2264.97 | 329.88 | 2266.76 | 331.88 | 0    | 0.986 | -0.01 |
| lh fusiform                   | 3297.57 | 348.83 | 3297.11 | 270.2  | 0    | 0.996 | 0.00  |

**Table S6. Whole brain analysis: Cortical thickness (exploratory)**

| Brain region            | HC    |       | CSBD  |       | F (1, 39) | p     | Cohens <i>d</i> |
|-------------------------|-------|-------|-------|-------|-----------|-------|-----------------|
|                         | Mean  | SD    | Mean  | SD    |           |       |                 |
| lh frontalpole          | 2.799 | 0.237 | 2.961 | 0.194 | 6.888     | 0.012 | 0.75            |
| rh precuneus            | 2.495 | 0.097 | 2.572 | 0.13  | 6.348     | 0.016 | 0.67            |
| lh superiorfrontal      | 2.803 | 0.154 | 2.89  | 0.148 | 5.726     | 0.022 | 0.58            |
| rh caudalmiddlefrontal  | 2.494 | 0.111 | 2.566 | 0.125 | 4.605     | 0.038 | 0.61            |
| lh parstriangularis     | 2.526 | 0.131 | 2.623 | 0.177 | 4.5       | 0.040 | 0.62            |
| rh superiorfrontal      | 2.774 | 0.135 | 2.839 | 0.141 | 3.986     | 0.053 | 0.47            |
| lh parsopercularis      | 2.644 | 0.107 | 2.714 | 0.154 | 3.432     | 0.072 | 0.53            |
| rh posteriorcingulate   | 2.58  | 0.127 | 2.647 | 0.154 | 3.363     | 0.074 | 0.48            |
| rh lateralorbitofrontal | 2.717 | 0.113 | 2.781 | 0.125 | 3.344     | 0.075 | 0.54            |
| rh superiorparietal     | 2.265 | 0.077 | 2.307 | 0.1   | 2.695     | 0.109 | 0.47            |
| lh fusiform             | 2.838 | 0.095 | 2.884 | 0.099 | 2.627     | 0.113 | 0.47            |
| rh parsopercularis      | 2.549 | 0.139 | 2.616 | 0.156 | 2.346     | 0.134 | 0.45            |
| rh isthmuscingulate     | 2.594 | 0.2   | 2.679 | 0.204 | 2.178     | 0.148 | 0.42            |
| lh paracentral          | 2.469 | 0.126 | 2.52  | 0.129 | 2.032     | 0.162 | 0.40            |
| lh superiorparietal     | 2.221 | 0.078 | 2.256 | 0.109 | 1.825     | 0.185 | 0.37            |
| rh paracentral          | 2.518 | 0.111 | 2.557 | 0.109 | 1.809     | 0.186 | 0.35            |
| lh precuneus            | 2.424 | 0.096 | 2.461 | 0.114 | 1.795     | 0.188 | 0.35            |
| rh fusiform             | 2.852 | 0.132 | 2.898 | 0.12  | 1.661     | 0.205 | 0.37            |
| lh medialorbitofrontal  | 2.644 | 0.138 | 2.686 | 0.116 | 1.639     | 0.208 | 0.33            |
| rh transversetemporal   | 2.5   | 0.161 | 2.575 | 0.213 | 1.581     | 0.216 | 0.40            |

|                             |       |       |       |       |       |       |       |
|-----------------------------|-------|-------|-------|-------|-------|-------|-------|
| lh caudalmiddlefrontal      | 2.603 | 0.133 | 2.653 | 0.161 | 1.562 | 0.219 | 0.34  |
| lh parsorbitalis            | 2.853 | 0.139 | 2.908 | 0.168 | 1.399 | 0.244 | 0.36  |
| rh inferiorparietal         | 2.513 | 0.095 | 2.544 | 0.103 | 1.313 | 0.259 | 0.31  |
| rh rostralmiddlefrontal     | 2.367 | 0.088 | 2.396 | 0.083 | 1.285 | 0.264 | 0.34  |
| lh rostralmiddlefrontal     | 2.524 | 0.13  | 2.569 | 0.161 | 1.259 | 0.269 | 0.31  |
| lh rostralanteriorcingulate | 2.944 | 0.208 | 2.999 | 0.177 | 1.22  | 0.276 | 0.28  |
| rh parstriangularis         | 2.453 | 0.135 | 2.496 | 0.15  | 1.222 | 0.276 | 0.30  |
| lh temporalpole             | 3.739 | 0.281 | 3.652 | 0.328 | 0.82  | 0.371 | -0.29 |
| lh superiortemporal         | 2.862 | 0.134 | 2.9   | 0.17  | 0.797 | 0.378 | 0.25  |
| lh bankssts                 | 2.457 | 0.159 | 2.418 | 0.138 | 0.785 | 0.381 | -0.26 |
| lh middletemporal           | 2.892 | 0.12  | 2.925 | 0.127 | 0.772 | 0.385 | 0.27  |
| lh lateralorbitofrontal     | 2.847 | 0.137 | 2.876 | 0.106 | 0.605 | 0.441 | 0.24  |
| rh pericalcarine            | 1.676 | 0.149 | 1.641 | 0.14  | 0.583 | 0.450 | -0.24 |
| lh pericalcarine            | 1.741 | 0.115 | 1.771 | 0.144 | 0.503 | 0.482 | 0.23  |
| rh middletemporal           | 2.803 | 0.153 | 2.774 | 0.119 | 0.476 | 0.494 | -0.21 |
| lh insula                   | 3.082 | 0.149 | 3.111 | 0.143 | 0.471 | 0.497 | 0.20  |
| lh precentral               | 2.663 | 0.116 | 2.686 | 0.13  | 0.46  | 0.502 | 0.19  |
| rh rostralanteriorcingulate | 2.944 | 0.184 | 2.989 | 0.264 | 0.457 | 0.503 | 0.20  |
| lh posteriorcingulate       | 2.58  | 0.154 | 2.606 | 0.169 | 0.453 | 0.505 | 0.16  |
| lh lateraloccipital         | 2.211 | 0.074 | 2.227 | 0.109 | 0.343 | 0.561 | 0.17  |
| lh isthmuscingulate         | 2.514 | 0.161 | 2.548 | 0.234 | 0.308 | 0.582 | 0.17  |
| rh medialorbitofrontal      | 2.637 | 0.122 | 2.658 | 0.161 | 0.306 | 0.583 | 0.15  |
| rh insula                   | 3.065 | 0.134 | 3.09  | 0.196 | 0.278 | 0.601 | 0.15  |
| rh caudalanteriorcingulate  | 2.524 | 0.231 | 2.558 | 0.255 | 0.272 | 0.605 | 0.14  |
| rh precentral               | 2.583 | 0.091 | 2.6   | 0.117 | 0.271 | 0.605 | 0.16  |

|                            |       |       |       |       |       |       |       |
|----------------------------|-------|-------|-------|-------|-------|-------|-------|
| lh entorhinal              | 3.56  | 0.265 | 3.521 | 0.242 | 0.233 | 0.632 | -0.15 |
| rh lingual                 | 2.175 | 0.092 | 2.161 | 0.099 | 0.226 | 0.637 | -0.15 |
| rh postcentral             | 2.134 | 0.068 | 2.149 | 0.123 | 0.205 | 0.654 | 0.15  |
| rh parsorbitalis           | 2.767 | 0.122 | 2.75  | 0.165 | 0.169 | 0.683 | -0.12 |
| lh transversetemporal      | 2.447 | 0.233 | 2.471 | 0.215 | 0.13  | 0.720 | 0.11  |
| rh lateraloccipital        | 2.351 | 0.101 | 2.361 | 0.097 | 0.129 | 0.722 | 0.10  |
| rh bankssts                | 2.52  | 0.142 | 2.534 | 0.113 | 0.124 | 0.727 | 0.11  |
| rh supramarginal           | 2.537 | 0.099 | 2.549 | 0.134 | 0.105 | 0.747 | 0.10  |
| lh parahippocampal         | 2.966 | 0.322 | 2.938 | 0.252 | 0.105 | 0.748 | -0.10 |
| lh lingual                 | 2.188 | 0.119 | 2.197 | 0.108 | 0.075 | 0.785 | 0.08  |
| rh frontalpole             | 2.844 | 0.227 | 2.863 | 0.283 | 0.061 | 0.807 | 0.07  |
| lh cuneus                  | 1.976 | 0.114 | 1.97  | 0.1   | 0.039 | 0.844 | -0.06 |
| rh temporalpole            | 3.704 | 0.29  | 3.688 | 0.308 | 0.028 | 0.868 | -0.05 |
| rh cuneus                  | 2.003 | 0.14  | 2.01  | 0.134 | 0.026 | 0.873 | 0.05  |
| rh parahippocampal         | 2.891 | 0.234 | 2.901 | 0.272 | 0.02  | 0.887 | 0.04  |
| lh postcentral             | 2.193 | 0.088 | 2.189 | 0.122 | 0.02  | 0.888 | -0.04 |
| rh entorhinal              | 3.704 | 0.26  | 3.693 | 0.341 | 0.016 | 0.901 | -0.04 |
| lh inferiortemporal        | 2.91  | 0.122 | 2.913 | 0.1   | 0.008 | 0.929 | 0.03  |
| lh supramarginal           | 2.548 | 0.105 | 2.545 | 0.139 | 0.007 | 0.932 | -0.02 |
| rh superiortemporal        | 2.825 | 0.128 | 2.822 | 0.136 | 0.006 | 0.941 | -0.02 |
| rh inferiortemporal        | 2.851 | 0.129 | 2.848 | 0.122 | 0.004 | 0.952 | -0.02 |
| lh caudalanteriorcingulate | 2.691 | 0.273 | 2.69  | 0.226 | 0.001 | 0.981 | 0.00  |
| lh inferiorparietal        | 2.443 | 0.132 | 2.443 | 0.117 | 0.001 | 0.981 | 0.00  |

**Table S7. Whole brain analysis: subcortical volume (exploratory)**

| Brain region      | HC   |     | CSBD |     | F (1, 39) | p     | Cohens <i>d</i> |
|-------------------|------|-----|------|-----|-----------|-------|-----------------|
|                   | Mean | SD  | Mean | SD  |           |       |                 |
| Right Accumbens   | 666  | 69  | 694  | 86  | 1.458     | 0.234 | 0.36            |
| Right Amygdala    | 1916 | 223 | 1844 | 188 | 1.302     | 0.261 | -0.35           |
| Left Hippocampus  | 4493 | 372 | 4354 | 424 | 1.243     | 0.272 | -0.35           |
| Left Accumbens    | 620  | 96  | 592  | 88  | 0.976     | 0.329 | -0.30           |
| Right Caudate     | 3632 | 421 | 3751 | 480 | 0.705     | 0.406 | 0.26            |
| Right Thalamus    | 7440 | 672 | 7503 | 463 | 0.14      | 0.710 | 0.11            |
| Left Thalamus     | 8072 | 849 | 8157 | 811 | 0.114     | 0.737 | 0.10            |
| Right Putamen     | 4986 | 557 | 5031 | 520 | 0.104     | 0.749 | 0.08            |
| Right Pallidum    | 2082 | 280 | 2108 | 230 | 0.101     | 0.752 | 0.10            |
| Right Hippocampus | 4452 | 367 | 4434 | 445 | 0.021     | 0.884 | -0.05           |
| Left Pallidum     | 2069 | 228 | 2077 | 238 | 0.015     | 0.902 | 0.04            |
| Left Putamen      | 4938 | 543 | 4954 | 537 | 0.011     | 0.918 | 0.03            |
| Left Caudate      | 3609 | 393 | 3622 | 470 | 0.01      | 0.921 | 0.03            |
| Left Amygdala     | 1748 | 231 | 1743 | 215 | 0.006     | 0.938 | -0.02           |



**Table S8. Whole brain analysis: white matter volume (exploratory)**

| Brain region               | HC       |         | CSBD     |         | F (1, 39) | p     | Cohens<br><i>d</i> |
|----------------------------|----------|---------|----------|---------|-----------|-------|--------------------|
|                            | Mean     | SD      | Mean     | SD      |           |       |                    |
| lh-bankssts                | 2818.95  | 730.08  | 2783.85  | 760.29  | 0.023     | 0.881 | -0.05              |
| lh-caudalanteriorcingulate | 2923.92  | 493.60  | 2954.27  | 376.52  | 0.05      | 0.825 | 0.07               |
| lh-cuneus                  | 2961.02  | 609.84  | 2775.8   | 450.38  | 1.254     | 0.270 | -0.35              |
| lh-entorhinal              | 1137.37  | 245.66  | 1092.25  | 236.71  | 0.359     | 0.552 | -0.19              |
| lh-fusiform                | 7225.17  | 797.68  | 6992.18  | 675.58  | 1.022     | 0.318 | -0.32              |
| lh-inferiorparietal        | 10427.41 | 1805.03 | 9915.12  | 1218.52 | 1.161     | 0.288 | -0.33              |
| lh-inferiortemporal        | 7123.86  | 957.19  | 6949.37  | 923.42  | 0.354     | 0.556 | -0.19              |
| lh-isthmuscingulate        | 4182.38  | 510.85  | 4087.58  | 412.64  | 0.446     | 0.508 | -0.20              |
| lh-lateraloccipital        | 10735.62 | 1724.31 | 10343.03 | 1228.56 | 0.714     | 0.403 | -0.26              |
| lh-lateralorbitofrontal    | 7473.91  | 929.21  | 7260.47  | 921.59  | 0.556     | 0.460 | -0.23              |
| lh-lingual                 | 5806.30  | 859.37  | 5619.78  | 859.74  | 0.49      | 0.488 | -0.22              |
| lh-medialorbitofrontal     | 4352.63  | 697.94  | 4237.39  | 729.23  | 0.284     | 0.597 | -0.16              |
| lh-middletemporal          | 6108.49  | 906.18  | 5849.07  | 801.02  | 1.118     | 0.297 | -0.30              |
| lh-parahippocampal         | 1727.06  | 242.92  | 1691.96  | 187.48  | 0.275     | 0.603 | -0.16              |

|                             |          |         |          |         |       |       |       |
|-----------------------------|----------|---------|----------|---------|-------|-------|-------|
| lh-paracentral              | 3953.88  | 542.23  | 4124.07  | 433.90  | 1.239 | 0.272 | 0.35  |
| lh-parsopercularis          | 4011.26  | 762.67  | 3771.73  | 722.25  | 1.064 | 0.309 | -0.32 |
| lh-parsorbitalis            | 1109.26  | 190.95  | 1140.70  | 206.30  | 0.254 | 0.617 | 0.12  |
| lh-parstriangularis         | 3325.36  | 472.82  | 3334.96  | 580.95  | 0.003 | 0.954 | 0.02  |
| lh-pericalcarine            | 3613.89  | 805.76  | 3405.97  | 566.52  | 0.926 | 0.342 | -0.30 |
| lh-postcentral              | 7723.10  | 954.07  | 7719.54  | 1088.35 | 0     | 0.991 | 0.00  |
| lh-posteriorcingulate       | 4604.09  | 470.09  | 4792.90  | 503.81  | 1.531 | 0.223 | 0.39  |
| lh-precentral               | 14201.99 | 1192.64 | 14205.09 | 1396.76 | 0     | 0.994 | 0.00  |
| lh-precuneus                | 10184.44 | 1654.50 | 9980.11  | 1377.58 | 0.186 | 0.669 | -0.13 |
| lh-rostralanteriorcingulate | 2837.03  | 404.71  | 2814.39  | 495.88  | 0.025 | 0.874 | -0.05 |
| lh-rostralmiddlefrontal     | 14141.72 | 2024.59 | 14226.38 | 2225.58 | 0.016 | 0.899 | 0.04  |
| lh-superiorfrontal          | 20069.72 | 2458.41 | 20007.50 | 1968.31 | 0.008 | 0.929 | -0.03 |
| lh-superiorparietal         | 13255.20 | 1605.14 | 13180.70 | 1551.34 | 0.023 | 0.880 | -0.05 |
| lh-superiortemporal         | 9153.49  | 1379.96 | 8956.19  | 1231.17 | 0.236 | 0.630 | -0.15 |
| lh-supramarginal            | 9600.74  | 1290.49 | 9906.46  | 1508.42 | 0.484 | 0.491 | 0.22  |
| lh-frontalpole              | 331.81   | 82.33   | 300.73   | 57.78   | 2.013 | 0.164 | -0.44 |
| lh-temporalpole             | 817.17   | 100.19  | 804.74   | 102.90  | 0.163 | 0.689 | -0.12 |
| lh-transversetemporal       | 888.74   | 134.81  | 819.91   | 128.0   | 2.811 | 0.102 | -0.52 |

|                            |          |         |          |         |       |       |       |
|----------------------------|----------|---------|----------|---------|-------|-------|-------|
| lh-insula                  | 10684.15 | 960.66  | 10637.58 | 945.07  | 0.024 | 0.877 | -0.05 |
| rh-bankssts                | 2825.81  | 537.12  | 2569.5   | 562.46  | 2.389 | 0.130 | -0.47 |
| rh-caudalanteriorcingulate | 2947.11  | 449.03  | 2708.07  | 360.37  | 3.602 | 0.065 | -0.59 |
| rh-caudalmiddlefrontal     | 6230.73  | 1001.70 | 6248.91  | 1263.23 | 0.003 | 0.959 | 0.02  |
| rh-cuneus                  | 3043.73  | 505.95  | 3093.41  | 428.94  | 0.115 | 0.736 | 0.11  |
| rh-entorhinal              | 999.63   | 199.04  | 882.77   | 177.46  | 3.959 | 0.054 | -0.62 |
| rh-fusiform                | 7036.90  | 1030.81 | 6582.22  | 728.79  | 2.783 | 0.103 | -0.51 |
| rh-inferiorparietal        | 12062.45 | 1837.57 | 11629.54 | 1394.52 | 0.743 | 0.394 | -0.27 |
| rh-inferiortemporal        | 6970.26  | 1107.54 | 6569.75  | 805.61  | 1.772 | 0.191 | -0.41 |
| rh-isthmuscingulate        | 3614.38  | 465.93  | 3503.83  | 462.48  | 0.581 | 0.451 | -0.24 |
| rh-lateraloccipital        | 11118.12 | 1477.95 | 11297.24 | 1720.79 | 0.13  | 0.721 | 0.11  |
| rh-lateralorbitofrontal    | 7922.78  | 1136.11 | 7582.66  | 917.34  | 1.127 | 0.295 | -0.33 |
| rh-lingual                 | 6513.62  | 902.96  | 6523.44  | 850.06  | 0.001 | 0.972 | 0.01  |
| rh-medialorbitofrontal     | 4087.23  | 394.88  | 4057.58  | 440.59  | 0.055 | 0.816 | -0.07 |
| rh-middletemporal          | 6823.17  | 1111.43 | 6263.05  | 859.20  | 3.746 | 0.060 | -0.56 |
| rh-parahippocampal         | 1698.04  | 231.85  | 1675.42  | 257.14  | 0.092 | 0.763 | -0.09 |
| rh-paracentral             | 4874.44  | 774.53  | 5040.27  | 758.01  | 0.486 | 0.490 | 0.22  |
| rh-parsopercularis         | 3569.21  | 619.88  | 3465.11  | 726.70  | 0.242 | 0.625 | -0.15 |

|                              |                |               |                |               |               |              |             |
|------------------------------|----------------|---------------|----------------|---------------|---------------|--------------|-------------|
| rh-parsorbitalis             | 1409.23        | 277.36        | 1400.37        | 176.48        | 0.015         | 0.903        | -0.04       |
| rh-parstriangularis          | 3651.41        | 670.39        | 3417.65        | 451.62        | 1.792         | 0.188        | -0.41       |
| rh-pericalcarine             | 3758.80        | 752.78        | 3743.54        | 545.76        | 0.006         | 0.941        | -0.02       |
| rh-postcentral               | 7548.38        | 1073.55       | 7512.17        | 922.56        | 0.014         | 0.907        | -0.04       |
| <b>rh-posteriorcingulate</b> | <b>4731.51</b> | <b>477.42</b> | <b>4315.89</b> | <b>347.88</b> | <b>10.258</b> | <b>0.003</b> | <b>1.00</b> |
| rh-precentral                | 14108.79       | 1767.91       | 14024.38       | 1383.24       | 0.031         | 0.862        | -0.05       |
| rh-precuneus                 | 10944.32       | 1973.81       | 10755.72       | 1522.47       | 0.122         | 0.729        | -0.11       |
| rh-rostralanteriorcingulate  | 2109.97        | 338.51        | 2161.74        | 373.93        | 0.215         | 0.646        | 0.15        |
| rh-rostralmiddlefrontal      | 13620.40       | 1912.23       | 14040.18       | 1767.21       | 0.539         | 0.467        | 0.23        |
| rh-superiorfrontal           | 19816.92       | 2596.70       | 19236.20       | 2237.32       | 0.606         | 0.441        | -0.24       |
| rh-superiorparietal          | 12848.31       | 1848.16       | 12514.92       | 1320.32       | 0.448         | 0.507        | -0.21       |
| rh-superiortemporal          | 7045.96        | 975.69        | 7048.57        | 931.39        | 0             | 0.993        | 0.00        |
| rh-supramarginal             | 9327.63        | 1598.46       | 9199.87        | 1150.60       | 0.088         | 0.769        | -0.09       |
| rh-frontalpole               | 412.29         | 85.70         | 398.85         | 51.91         | 0.379         | 0.542        | -0.19       |
| rh-temporalpole              | 795.78         | 160.25        | 758.06         | 150.81        | 0.668         | 0.419        | -0.24       |
| rh-transversetemporal        | 598.08         | 114.06        | 645.22         | 154.35        | 1.221         | 0.276        | 0.35        |
| rh-insula                    | 10270.98       | 1004.82       | 10495.46       | 921.99        | 0.56          | 0.459        | 0.23        |

*Note:* across all white matter regions covering the whole brain, the only significant ( $p < 0.05$ ) case-control difference was found in white matter volume underlying the right posterior cingulate cortex (bold).

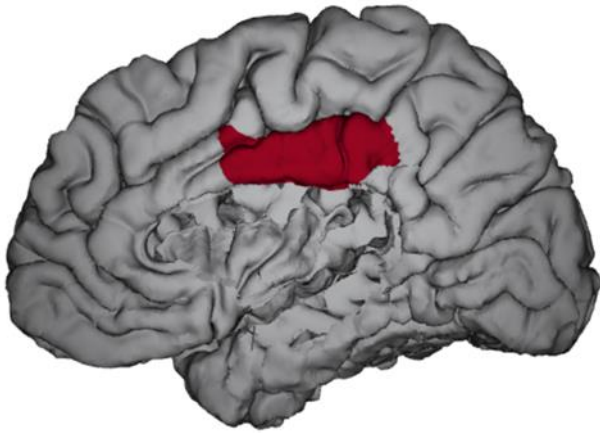

**Figure S1.** Anatomical location of posterior cingulate cortex, where case- control differences in surface area were observed after multiple comparison correction.

## REFERENCES

- Kafka, M. P. (2010). Hypersexual disorder: a proposed diagnosis for DSM-V. *Archives of Sexual Behavior, 39*(2), 377-400. doi:10.1007/s10508-009-9574-7
- Liberg, B., Görts-Öberg, K., Jokinen, J., Savard, J., Dhejne, C., Arver, S., . . . Abé, C. (2022). Neural and behavioral correlates of sexual stimuli anticipation point to addiction-like mechanisms in compulsive sexual behavior disorder. *J Behav Addict, 11*(2), 520-532. doi:10.1556/2006.2022.00035
- Parsons, J. T., Rendina, H. J., Ventuneac, A., Cook, K. F., Grov, C., & Mustanski, B. (2013). A psychometric investigation of the hypersexual disorder screening inventory among highly sexually active gay and bisexual men: an item response theory analysis. *J Sex Med, 10*(12), 3088-3101. doi:10.1111/jsm.12117
- Raven, J., Raven, J. C., & Court, J. H. (2000). *Manual for Raven's progressive matrices and vocabulary scales. Section 3, The Standard Progressive Matrices*. San Antonio, TX: Harcourt Assessment.
- Reid, R. C., Garos, S., & Carpenter, B. N. (2011). Reliability, Validity, and Psychometric Development of the Hypersexual Behavior Inventory in an Outpatient Sample of Men. *Sexual Addiction & Compulsivity, 18*(1), 30-51. doi:10.1080/10720162.2011.555709
- Sheehan, D. V., Lecrubier, Y., Sheehan, K. H., Amorim, P., Janavs, J., Weiller, E., . . . Dunbar, G. C. (1998). The Mini-International Neuropsychiatric Interview (M.I.N.I.): the development and validation of a structured diagnostic psychiatric interview for DSM-IV and ICD-10. *Journal of Clinical Psychiatry, 59 Suppl 20*, 22-33;quiz 34-57.

- Bergman, H., & Kallmen, H. (2002). Alcohol use among Swedes and a psychometric evaluation of the alcohol use disorders identification test. *Alcohol and Alcoholism*, 37(3), 245-251. doi:10.1093/alcalc/37.3.245
- Berman, A. H., Bergman, H., Palmstierna, T., & Schlyter, F. (2005). Evaluation of the Drug Use Disorders Identification Test (DUDIT) in criminal justice and detoxification settings and in a Swedish population sample. *European Addiction Research*, 11(1), 22-31. doi:10.1159/000081413
- Carver, C. S., & White, T. L. (1994). Behavioral inhibition, behavioral activation, and affective responses to impending reward and punishment: The BIS/BAS Scales. *Journal of Personality and Social Psychology*, 67(2), 319-333. doi:10.1037/0022-3514.67.2.319
- Eriksson, J. M., Andersen, L. M., & Bejerot, S. (2013). RAADS-14 Screen: validity of a screening tool for autism spectrum disorder in an adult psychiatric population. *Molecular Autism*, 4(1), 49. doi:10.1186/2040-2392-4-49
- Kafka, M. P. (2010). Hypersexual disorder: a proposed diagnosis for DSM-V. *Archives of Sexual Behavior*, 39(2), 377-400. doi:10.1007/s10508-009-9574-7
- Kalichman, S. C., & Rompa, D. (1995). Sexual sensation seeking and Sexual Compulsivity Scales: reliability, validity, and predicting HIV risk behavior. *Journal of Personality Assessment*, 65(3), 586-601. doi:10.1207/s15327752jpa6503\_16
- Kessler, R. C., Adler, L., Ames, M., Demler, O., Faraone, S., Hiripi, E., . . . Walters, E. E. (2005). The World Health Organization Adult ADHD Self-Report Scale (ASRS): a short screening scale for use in the general population. *Psychological Medicine*, 35(2), 245-256. doi:10.1017/s0033291704002892
- Montgomery, S. A., & Asberg, M. (1979). A new depression scale designed to be sensitive to change. *British Journal of Psychiatry*, 134, 382-389.
- Parsons, J. T., Rendina, H. J., Ventuneac, A., Cook, K. F., Grov, C., & Mustanski, B. (2013). A psychometric investigation of the hypersexual disorder screening inventory among highly sexually active gay and bisexual men: an item response theory analysis. *The Journal of Sexual Medicine*, 10(12), 3088-3101. doi:10.1111/jsm.12117
- Reid, R. C., Garos, S., & Carpenter, B. N. (2011). Reliability, Validity, and Psychometric Development of the Hypersexual Behavior Inventory in an Outpatient Sample of Men. *Sexual Addiction & Compulsivity*, 18(1), 30-51. doi:10.1080/10720162.2011.555709
- Spector, I. P., Carey, M. P., & Steinberg, L. (1996). The sexual desire inventory: development, factor structure, and evidence of reliability. *Journal of Sex and Marital Therapy*, 22(3), 175-190. doi:10.1080/00926239608414655
- Stanford, M. S., Mathias, C. W., Dougherty, D. M., Lake, S. L., Anderson, N. E., & Patton, J. H. (2009). Fifty years of the Barratt Impulsiveness Scale: An update and review. *Personality and Individual Differences*, 47(5), 385-395. doi:10.1016/j.paid.2009.04.008
- Svanborg, P., & Asberg, M. (2001). A comparison between the Beck Depression Inventory (BDI) and the self-rating version of the Montgomery Asberg Depression Rating Scale (MADRS). *Journal of Affective Disorders*, 64(2-3), 203-216. doi:10.1016/s0165-0327(00)00242-1

Tluczek, A., Henriques, J. B., & Brown, R. L. (2009). Support for the reliability and validity of a six-item state anxiety scale derived from the State-Trait Anxiety Inventory. *Journal of Nursing Measurement*, 17(1), 19-28. doi:10.1891/1061-3749.17.1.19
